# Supplementary material for: The in-silico characterization of the Caenorhabditis elegans matrisome and proposal of a novel collagen classification
Source: PubMed Central journal article supplement — Matrix Biol Plus. 2019 Feb 21;1:100001. doi: 10.1016/j.mbplus.2018.11.001 (PMC7852208; doi:10.1016/j.mbplus.2018.11.001), 2019-02-21
Supplement: mmc1.pdf [file mmc1.pdf]

# Supplementary Figure 2

Sequence logo of the N-terminal region of cuticular collagens

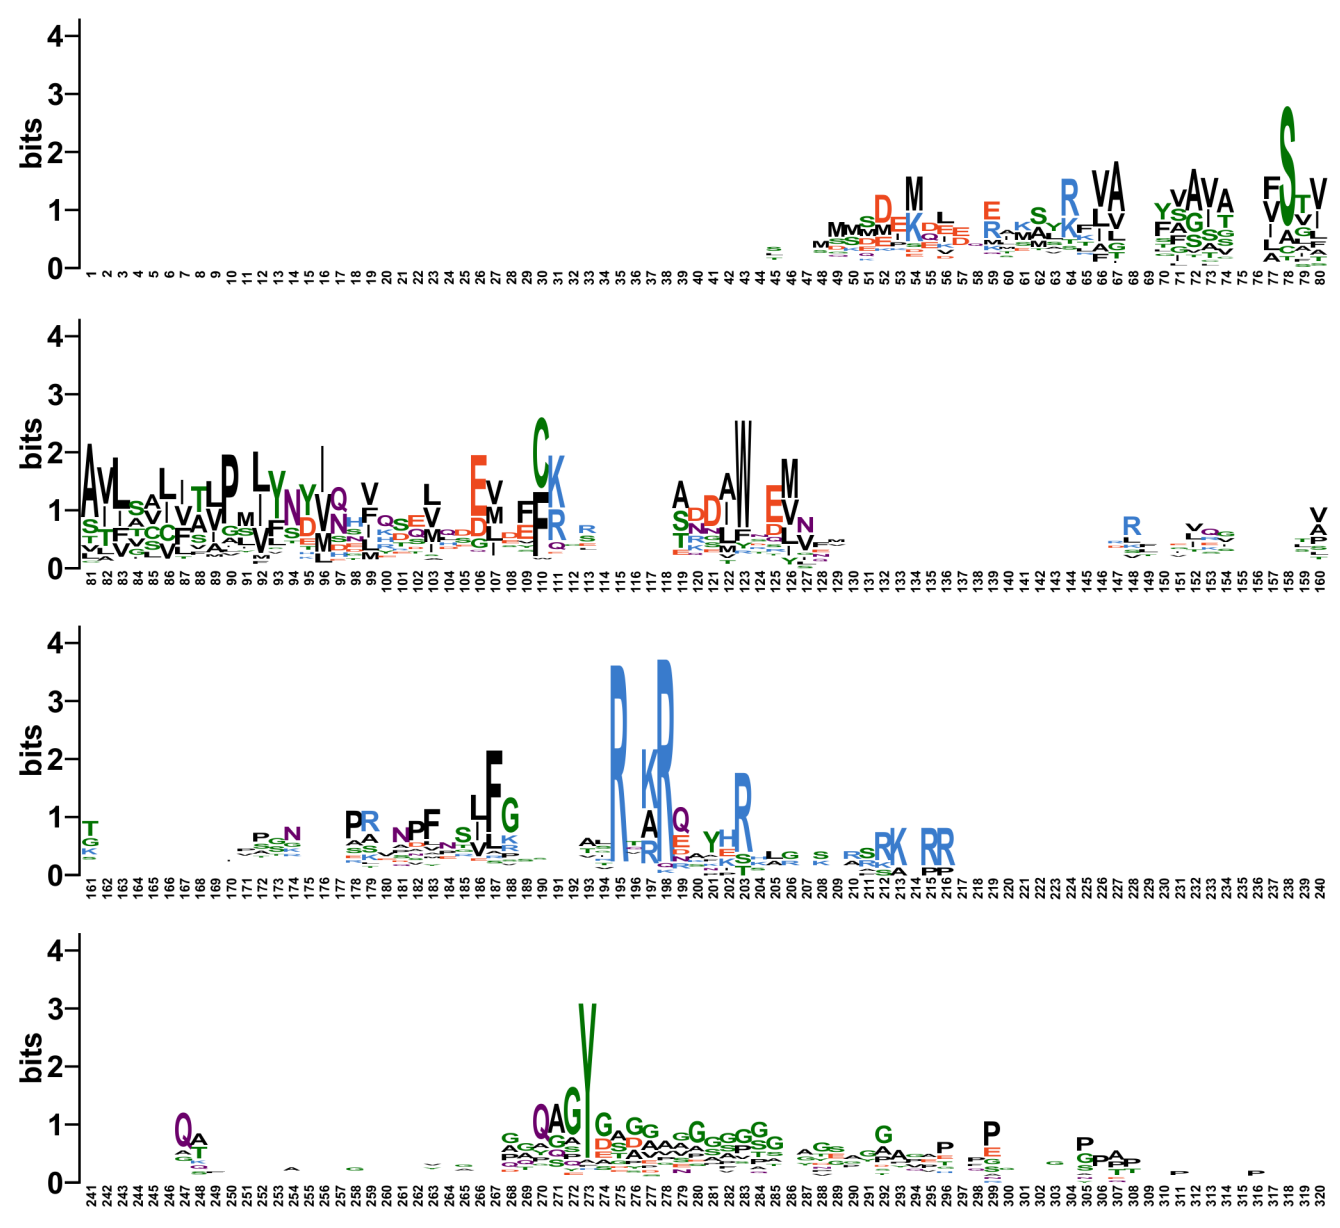

# Supplementary Figure 3

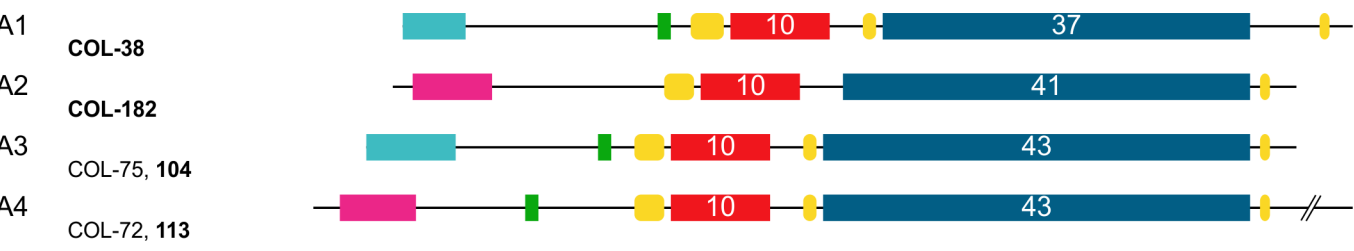



# Supplementary Figure 5

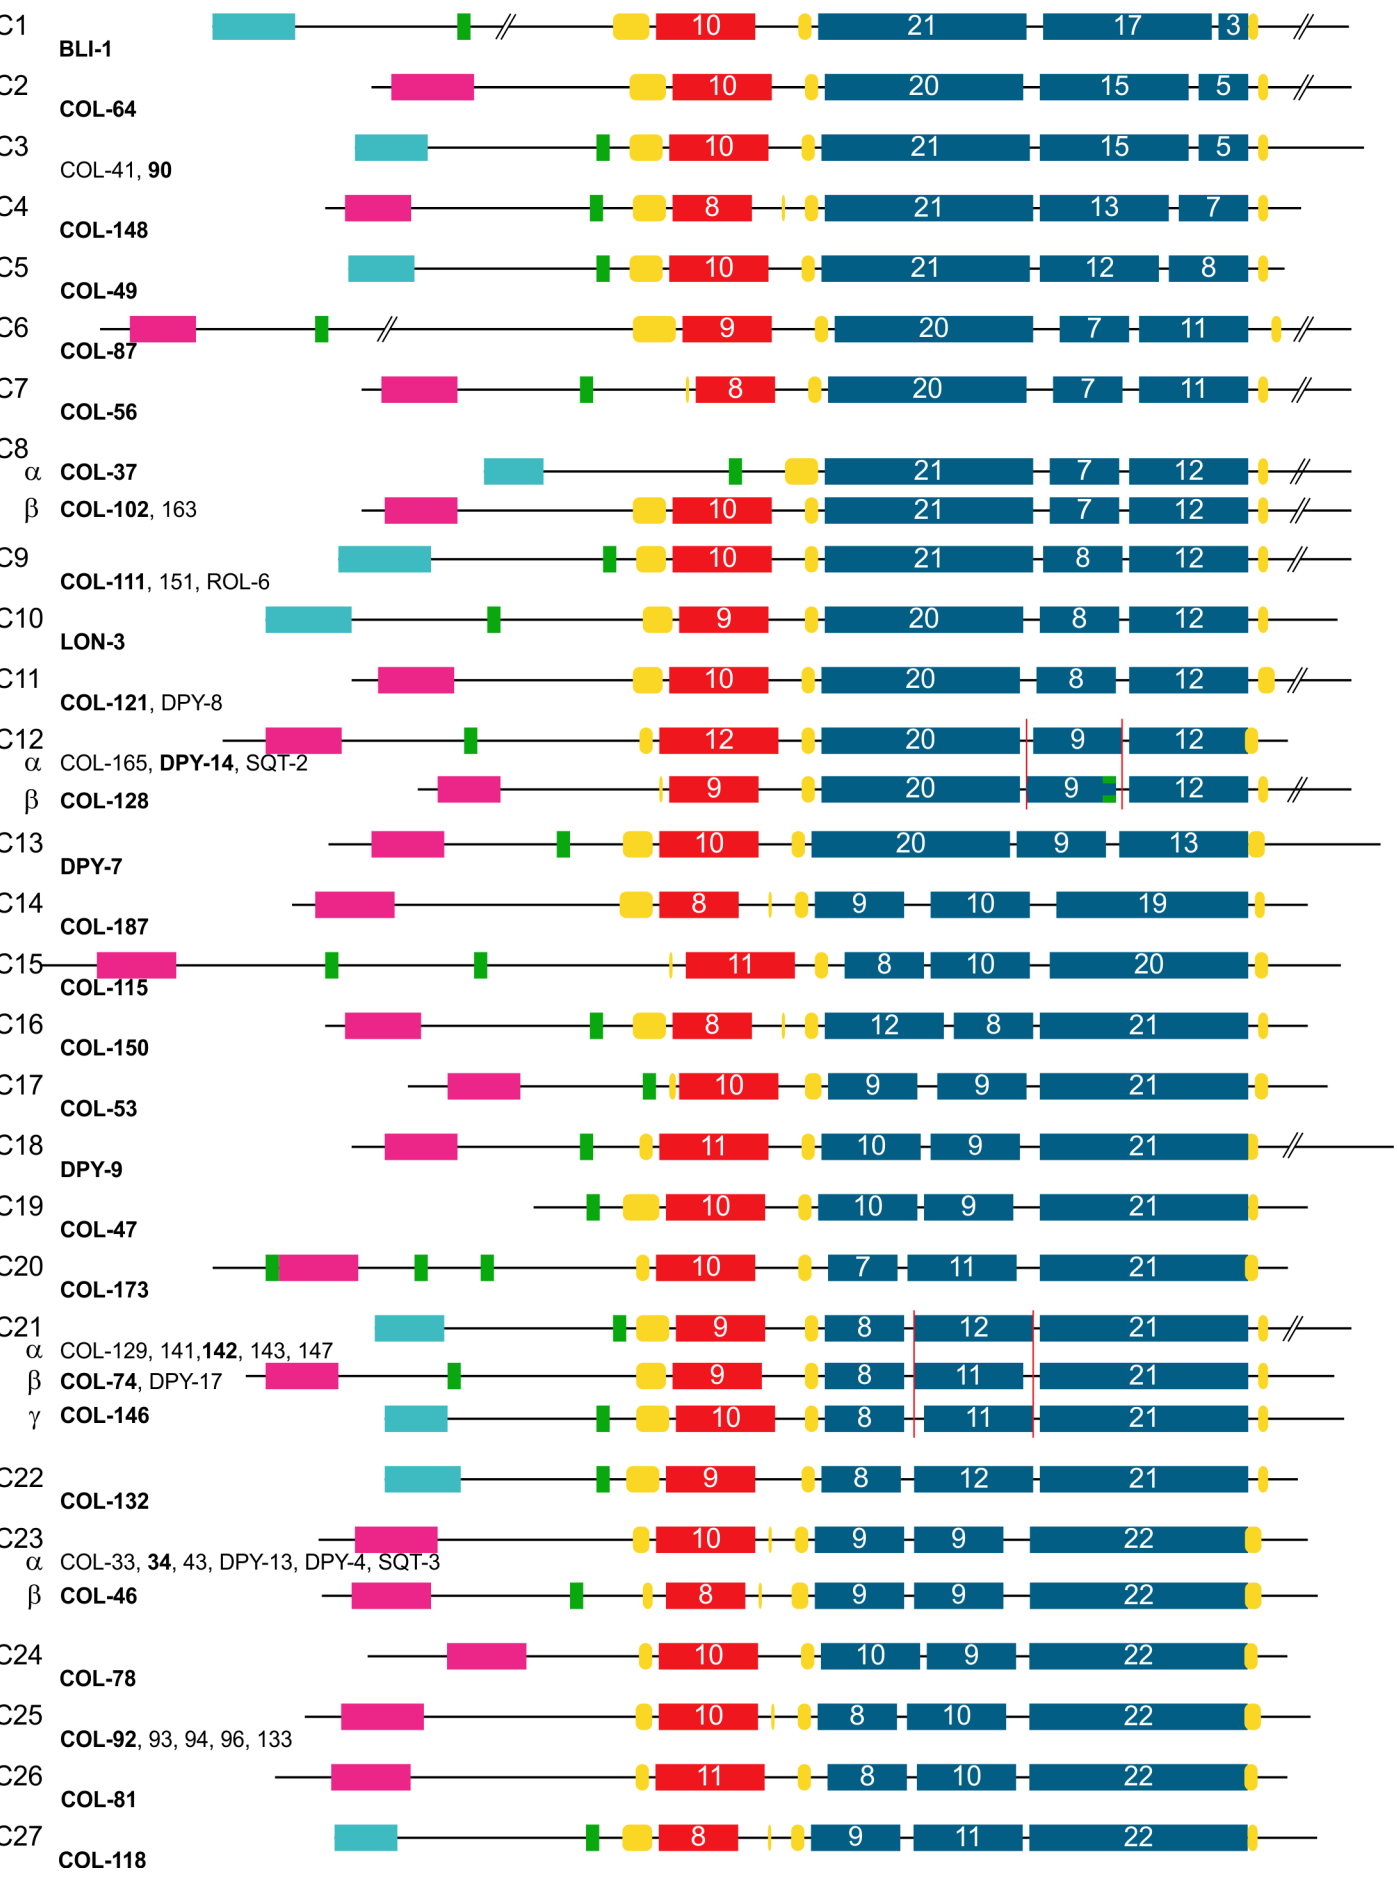

# Supplementary Figure 6

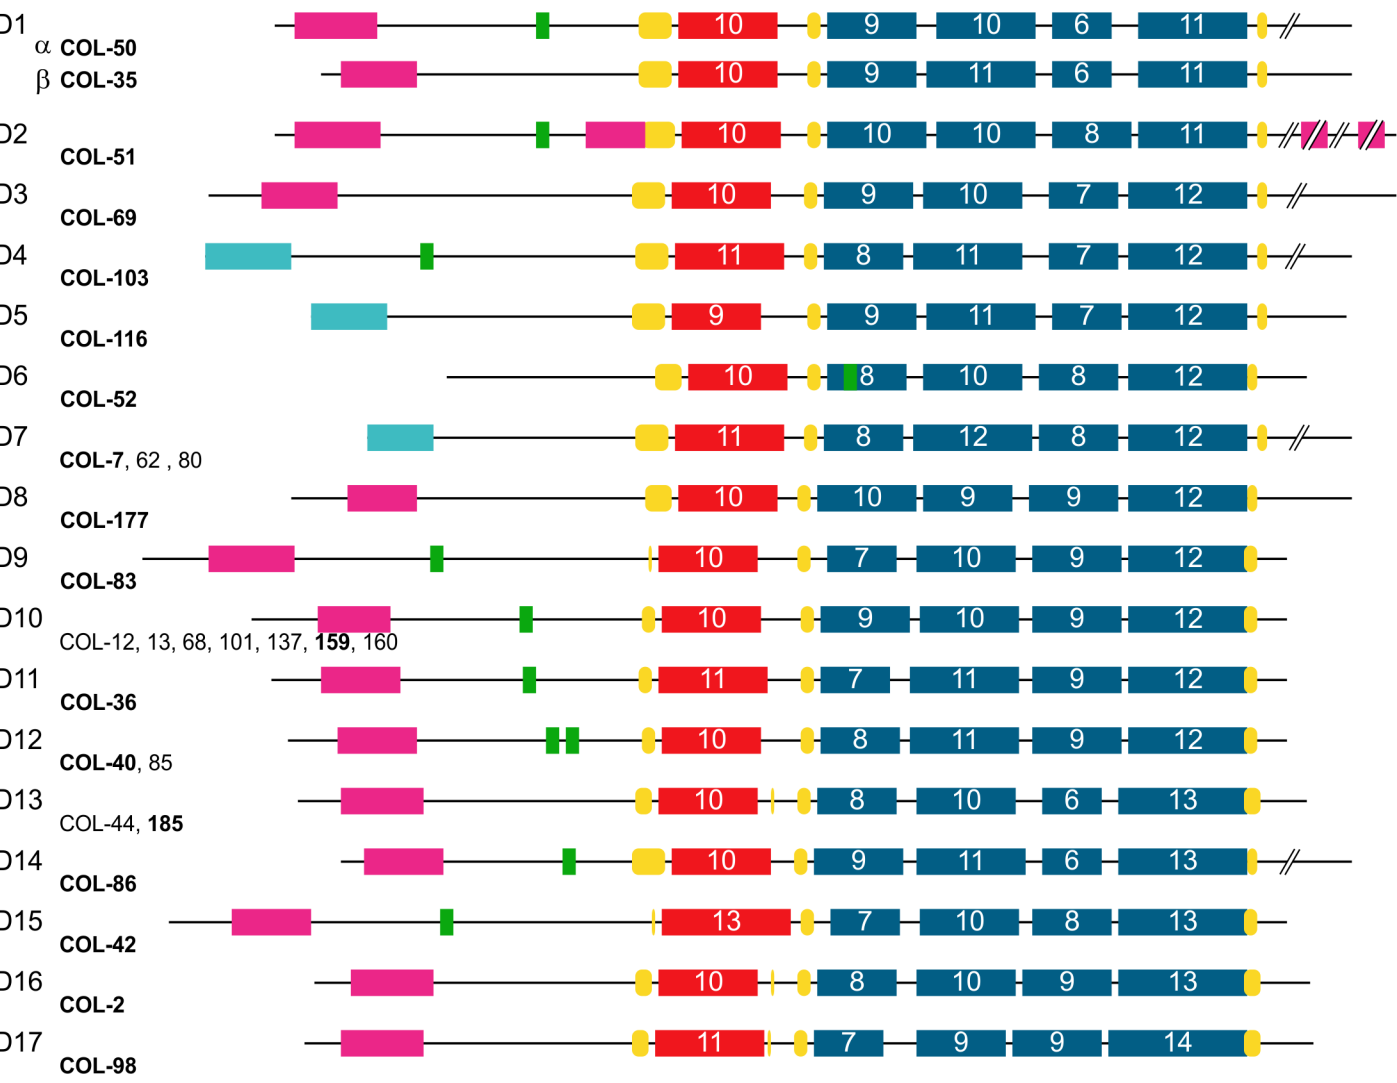

# Supplementary Figure 7

Cluster E

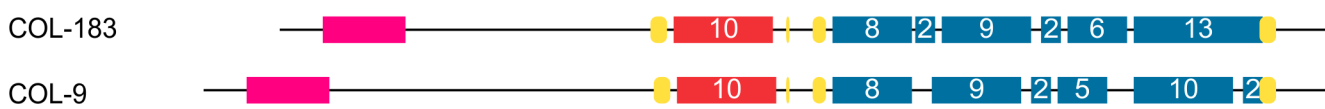





# Supplementary Figure 9

A.

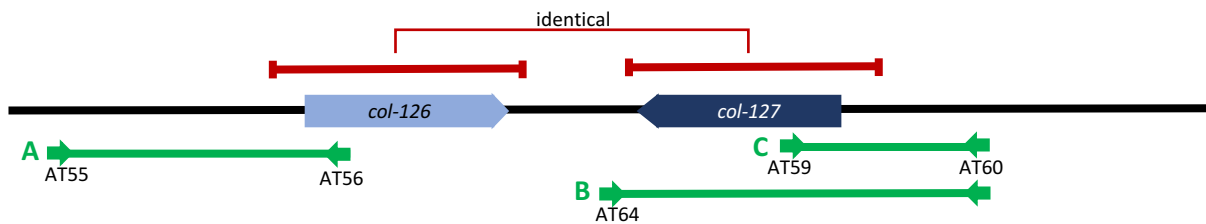

B.

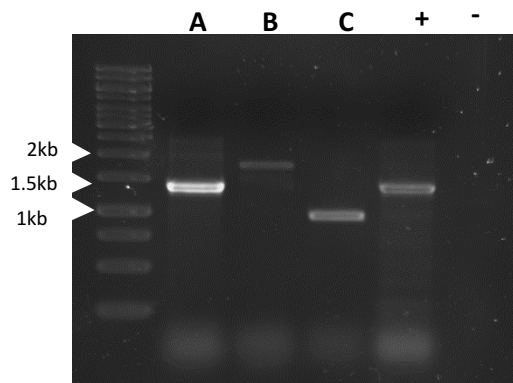

C.

| Name | Sequence                 |
|------|--------------------------|
| AT55 | CCCATCTCGTCCATCTCTCC     |
| AT56 | GGAGTGACAGTAACCTGAATGTCC |
| AT59 | ACGCTTTTGACGGAAGACAG     |
| AT60 | CACAGATTATTCTCAAATGCCGTC |
| AT64 | GCAACCAAGAAGCAGTATGC     |

D.

| Name | Sequencing result                                                                                                                                                                                                                                                                                                                                                                                                                                                                                                                                                                                                                                                                                                                                                                                                                                                                                                                                                             |
|------|-------------------------------------------------------------------------------------------------------------------------------------------------------------------------------------------------------------------------------------------------------------------------------------------------------------------------------------------------------------------------------------------------------------------------------------------------------------------------------------------------------------------------------------------------------------------------------------------------------------------------------------------------------------------------------------------------------------------------------------------------------------------------------------------------------------------------------------------------------------------------------------------------------------------------------------------------------------------------------|
| A1   | TTGGAGATTGGTCTCGTGAGAAAATTAATGATACTCAGCATGTGCTTCAGACAAAAGTTTATATCCGGAGCCACCGGTTTCCATTGACGGGAAGAAAGTGTAGTCTTTAACAAGTTTTCTGTTGGTTGGTTGCTTAGGAAGAAACGCATTATCTTGACCGGATGAGCTACTTGAATAGAAGTCTCATCGAATTACAGAAATAAAAATATATGCTGATTTCTTCAGAAAATGCAACTACATTGGTCGCATTCTTGGTCCATCAGGAATGTCTGCAAGAATGATTGAAAATCAATATGATGTTACTCTTATTTCGTGGAGCCGGATCTGTGAGAAACAAGGCAATGATGAAAAGAGTGAGGAAGAGAAATGAACACTTGGAGGAGCCCTTCAGGTTCTTCTTATTGCAAGACACAATGACAAGACAAGTTGTCTAAATATAATAATTTCTTAATACTACAAGAGTTTAGATGTGAGGAGATTCTCAACAAGGCTGCAGAAAAAATGAAAAGTCTTTGACTCCAATTCATGATGAGTACAAAAATGGATCAATTTGGTTAGTTATGCAAAAGATGAATGGAACCTTATCAGGAAAGACCAAAAAAGAAA AAGCCAAATGGATGAGCAATCCCATAGTAATTATTGGGCTCCACACTGAAAAGAGATGTAGAAGATCCAGAAATTAATAAATTA-TTGATTCTGCGGATATAAAGGATTGAATTGATTGTTACTGAAATCTCAGATAACAATGCCACATGGGGTGTGA                                                                                                                                                                                 |
| A2   | GGGCTGCAGAAAAAATTGAAAAGTCTTTTTGACTCCAATTCATGATGAGTACAAAAATGGATCAATTTGGTTAGGTTATGCAAAA GATGAAATGGAACCTTATCAGGAAGAACCAAAAAAGAAAAGCCAATTGGATGAGCAATCCCATAGTAATTATTGGGCTCCACACTGA AAGAGATGTAGAAGATCCAGAAATTATAAATTTATTGATTCTGCGGATATAAAGGATTGAATTGATTGTTACTGAAATCTCAGAT AACAAATGCCACATGGGTGTTGAATTTGTGCAAAATCAATAAGACCTTTACACGGAACCTGTTACGAAATGATTATACGTTACAACAA GGACAATACTTCTGAAAAATAAATTTCTCTGCGCTTACCCTCGCCTAATTGTTGGCTTCTTCTTTTAAATGAGGAAGTAATGTTTTTA ACTGAATATTGCTTTACACTCTCCACCTAATTGCAAAAAAGTGTAGGAGTAACACATTCATAAAGAATGAAGAAAAGATGAGTATAA AAAGAAAAGAAAATCAAGAGAAAAGGTACCATTTCGACATGGAGAAGATTCTTGAACCATCTCAACTGGAGCTGCATCCATTGCAG TTTTGGCTGTTCTTTCACTGTTCCATCTCTACAATACCATCAACGAAGTTCATGATCAAGTAAGTTATTCATACAGTTTCC                                                                                                                                                                                                                                                        |
| C1   | GGAGACAGAGTTGAATGGATTGACACGTGGCTTAGTTGGTGGAGTGACAGTAACCTGAATGTCCATCATCTCGTCCAAGCAGAATC GGTTTTCAACACGGAAAACGGAACTCCATCAAGAACCTGAAATTAATTAATGTGATGAAGTGAACTGTATGAATAAATTAATTAATGATC ATGAACCTCGTTGATGGTATTGTAGAGAGATGGAACAGTGAAAAGAAGACGCAAAACTGCAATGGATGCAGCTCCAGTTGAGATGGT TACAAGAATCTTCCATGTGCAAAATGGTACCTTTCTCTTGTATTTCTTTCTTTTATACTCATCTTTTCTTCAATCTTTATGAAATGTGT ACTCCTACACTTTTTTGAATAAGGTGGAAGAGTGTAAAGCAATATTCAGTTAAAAACATTACTTCTCATTAAAAAGGAAGAACCCAC AATTAGGCGCGGAAGGTCCGACAGTGGACGTTGTAACCTACAAAAAGGAAAGCAAGGACAATGCGATTTCCGCAAGACAACAAT AAACCTTGAATTTATGAACTTTTGGTAGATGGCAAGAGAGAGAGAGAAGGGTTTAACTGGCCACAATCCTGTGTTTATTTACTTCTT GTATCTAGTTAATATGTATGTAGAATATTTAGCAGATTTTGTATTTGGATTGAAATAAAACATTTTTTATAATAAAAAATTAAGG GTGATGTTGATTAATATTAGAAAGTTCGGGAAAAATTTGAGAGACAATATCTTTATTAATAAACTGGAGTCAATCTGAATCCATCTGCC CAATTTTTTCCAATGGTTTGTCTATTTTCATCAGTTGTCATTCCATTTGGACGAAGAAATCTCAATTTGATTTTGTCAATTTCAAGAGGAA TTTTCCGAAATGATGAGAGTGAATTCGGGCGGTATGGAGATTGGAAGGACTTGAAT |
| C2   | GGCTTAGTTGGTGGAGTGACAGTAACCTGAATGTCCATCATCTCGGTCCAAGCAGAATCGCTTCAACACGGAAAACGGAACTCC ATCAAGAACCTGAAATTAATTAATGTGATGAAGTGAACTGTATGAATAAATTAATTAATGATCATTGATCAATCTCGTTGATGGTATTGTAGAG AGATGGAACAGTGAAAAGAAGACGCAAAACTGCAATGGATGCAGCTCCAGTTGAGATGGTTACAAGAATCTTCTCCATGTGCAAAATG GTACCTTTCTCTGTATTTCTTTTATACTCATCTTTCTTCACTTTATGAATGTGTTACTCTACACTTTTTTGAATAAAGGTG GAAGAGTGTAAAGCAATATTCAGTTAAAAACATTACTTCTCATTAAAAAGGAAAGCCACAATTAGGCGCGGAAGGTCCGACAGTG GACGTTGTAACTTACAAAAAGGAAAGCAAGGACAATGCGATTTCCGCAAGACAACAATAAATTTGAATTTATGAATTTTGGTAG ATGGCAAGAGAGAGAGAAAAGGGTTAACCTGGCCACAATCCTGTGTTTATTTACTTCTGTATCTAGTTAATATGTATGTAGAATA TTTTAGCAGATTTTGTATTTGGATTGAAATAAAAACATTTTTTTATAATAAAAAATTAAGG                                                                                                                                                                                                                                                                                 |
